# Supplementary material for: Tuning the coordination chemistry of a Cu(ii) complex at high-pressure
Source: Royal Society of Chemistry journal article supplement (doi:10.1039/c2dt12302a), 2012-01-01
Supplement: c2dt12302a.pdf [file c2dt12302a.pdf]

## ***Experimental Section***

### ***Synthesis***

All reagents were used without any further purification: copper nitrate pentahydrate ( $\geq 98\%$ ) was purchased from Alfa Aesar, L-aspartic acid ( $\geq 98\%$ , Fluka) and sodium hydrogen carbonate (Fisher Scientific). The synthesis was carried out using Parr Teflon-lined stainless steel autoclaves under autogenous pressure.

Blue needle-like crystals of CuAsp were synthesized by stirring  $\text{Cu}(\text{NO}_3)\cdot 5\text{H}_2\text{O}$  (0.209g, 0.751mmol), L-aspartic acid (0.1g, 0.751mmol) and  $\text{NaHCO}_3$  (0.063g, 0.751mmol $^{-1}$ ) in a water/methanol mixture (2/2ml respectively), giving a molar composition for the reaction of 1:1 Cu:asp. The resulting mixture was sealed in a 23mL autoclave and heated at 100 °C for 18hrs. Upon cooling at a rate of 0.2 °C min $^{-1}$  to room temperature, the product was filtered and washed with water and methanol.

### ***High-Pressure Crystallography***

#### ***General Procedures***

High-pressure experiments were carried out with a Merrill-Bassett diamond anvil cell equipped with 600 $\mu\text{m}$  culet diamonds and a tungsten gasket. The sample and a chip of ruby (as a pressure calibrant) were loaded into the DAC with a 4:1 mixture of methanol and ethanol as a hydrostatic medium. The ruby fluorescence method was utilised to measure the pressure <sup>1</sup>.

#### ***Data Collection, Reduction and Refinement***

A sphere of data was collected on a crystal of  $[\text{Cu}(\text{L-Asp})(\text{H}_2\text{O})_2]$  at ambient temperature and pressure in order to provide data for comparison with the high pressure studies, which were also performed at ambient temperature (see below). Diffraction data were collected on a single crystal of  $[\text{Cu}(\text{L-Asp})(\text{H}_2\text{O})_2]$  solvate on a Bruker SMART APEX diffractometer with graphite-monochromated Mo K $\alpha$  radiation ( $\lambda = 0.71073 \text{ \AA}$ ). These data were integrated using the program SAINT <sup>2</sup>, while the absorption correction was carried out with the program SADABS <sup>3</sup>. Refinement was carried out against  $|F|^2$  using all data <sup>4</sup> and the structure solved using Sir92<sup>5</sup>. The final conventional *R*-factor was 0.0329 for 2470 data. Listings of crystal and refinement data are given in Table S1.

High pressure diffraction data were collected with synchrotron radiation on a Bruker APEX II diffractometer at the CCLRC Daresbury Laboratory on Station 9.8 ( $\lambda = 0.4762 \text{ \AA}$ ), see below. Data were collected in  $\omega$ -scans in 8 settings of  $2\theta$  and  $\phi$  with a frame and step size of one second and 0.3°, respectively. This data collection strategy was based on that described by <sup>6</sup>. The data were integrated using the program SAINT using 'dynamic masks' to avoid integration of regions of

the detector shaded by the body of the pressure cell <sup>6</sup>. Absorption corrections for the DAC and sample were carried out with the programs SHADE <sup>7</sup> and SADABS, respectively. Data were collected from 0.3 GPa up to a final pressure of 7.9 GPa, above which the sample became polycrystalline. On increasing pressure from 6.8 GPa to 7.9 GPa, the sample underwent a single-crystal to single-crystal phase transition.

Refinements of [Cu(L-Asp)(H<sub>2</sub>O)<sub>2</sub>]-I (the ambient pressure phase) to 6.8 GPa were carried out starting from our room temperature re-determination of the structure. Refinements were carried out against  $|F|^2$  using all data (CRYSTALS). Because of the low completeness of the high-pressure data-sets, all 1,2 and 1,3 distances on the aspartate ligand were restrained to the values observed in the ambient pressure structure, however all torsion angles and metal to ligand distances were refined freely. Thermal similarity restraints were also applied to the aspartate ligand. All hydrogen atoms attached to carbon and nitrogen were placed geometrically and not refined. H-atoms attached to the water ligands were placed in idealised H-bonding positions, and then refined with restraints (O-H distance restraint = 0.84, 0.01) until the refinement converged. Once converged H-atoms were refined with a riding model. Only the Copper atom was refined anisotropically, while all other non-hydrogen atoms were refined with isotropic thermal parameters.

[Cu(L-Asp)(H<sub>2</sub>O)<sub>2</sub>]-II at 7.9 GPa (the high-pressure phase), was refined from the ambient pressure phase coordinates. On undergoing the transition, a large decrease was observed in the  $\beta$ -angle. The high-pressure phase was therefore refined with an unconventional  $\beta$ -angle that was less than 90 degrees. Listings of crystal and refinement data are given in Table S1.

**Table 1. Experimental details**

For all structures: monoclinic,  $C2$ ,  $Z = 4$ . Experiments were carried out at 293 K. H-atom parameters were constrained.

|                                                                                       | ambient                                   | 0.3 GPa                                           | 0.9 GPa                                           | 1.8 GPa                                           | 3.5 GPa                                           |
|---------------------------------------------------------------------------------------|-------------------------------------------|---------------------------------------------------|---------------------------------------------------|---------------------------------------------------|---------------------------------------------------|
| Crystal data                                                                          |                                           |                                                   |                                                   |                                                   |                                                   |
| Chemical formula                                                                      | $C_8H_{18}Cu_2N_2O_{12}$                  | $C_4H_9CuNO_6$                                    | $C_4H_9CuNO_6$                                    | $C_4H_9CuNO_6$                                    | $C_4H_9CuNO_6$                                    |
| $M_r$                                                                                 | 230.67                                    | 230.66                                            | 230.66                                            | 230.66                                            | 230.66                                            |
| $a, b, c$ (Å)                                                                         | 9.5172 (1),<br>10.0418 (1),<br>7.5621 (1) | 9.4817 (3),<br>10.0118 (3),<br>7.5433 (7)         | 9.3964 (3),<br>9.9334 (4),<br>7.5076 (9)          | 9.2843 (3),<br>9.8358 (4),<br>7.4532 (7)          | 9.1425 (9),<br>9.7138 (11),<br>7.361 (2)          |
| $\beta$ (°)                                                                           | 93.984 (1)                                | 93.856 (4)                                        | 93.536 (6)                                        | 93.071 (5)                                        | 92.265 (16)                                       |
| $V$ (Å <sup>3</sup> )                                                                 | 720.96 (1)                                | 714.46 (7)                                        | 699.41 (9)                                        | 679.64 (7)                                        | 653.2 (2)                                         |
| Radiation type                                                                        | Mo $K\alpha$                              | Synchrotron,<br>$\lambda = 0.47620$<br>Å          | Synchrotron,<br>$\lambda = 0.47620$<br>Å          | Synchrotron,<br>$\lambda = 0.47620$<br>Å          | Synchrotron,<br>$\lambda = 0.47620$<br>Å          |
| $\mu$ (mm <sup>-1</sup> )                                                             | 3.02                                      | 3.05                                              | 3.12                                              | 3.21                                              | 3.34                                              |
| Crystal size (mm)                                                                     | 0.2 × 0.2 ×<br>0.1                        | 0.20 × 0.20 ×<br>0.10                             |
| Data collection                                                                       |                                           |                                                   |                                                   |                                                   |                                                   |
| Diffractometer                                                                        | Unknown<br>diffractometer                 | Bruker<br>Apex2<br>diffractometer                 | Bruker<br>Apex2<br>diffractometer                 | Bruker<br>Apex2<br>diffractometer                 | Bruker<br>Apex2<br>diffractometer                 |
| Absorption correction                                                                 | –                                         | Multi-scan<br><i>SADABS</i><br>(Siemens,<br>1996) | Multi-scan<br><i>SADABS</i><br>(Siemens,<br>1996) | Multi-scan<br><i>SADABS</i><br>(Siemens,<br>1996) | Multi-scan<br><i>SADABS</i><br>(Siemens,<br>1996) |
| $T_{min}, T_{max}$                                                                    | –                                         | 0.53, 0.74                                        | 0.52, 0.73                                        | 0.55, 0.73                                        | 0.62, 0.72                                        |
| No. of measured,<br>independent and<br>observed [ $I > 2.0\sigma(I)$ ]<br>reflections | 5337, 1732,<br>1607                       | 2706, 855,<br>639                                 | 2725, 838,<br>486                                 | 2659, 810,<br>626                                 | 2568, 786,<br>595                                 |
| $R_{int}$                                                                             | 0.026                                     | 0.044                                             | 0.039                                             | 0.037                                             | 0.041                                             |
| Refinement                                                                            |                                           |                                                   |                                                   |                                                   |                                                   |
| $R[F^2 > 2\sigma(F^2)],$<br>$wR(F^2), S$                                              | 0.022, 0.051,<br>0.98                     | 0.032, 0.087,<br>0.92                             | 0.027, 0.057,<br>0.84                             | 0.031, 0.068,<br>0.96                             | 0.038, 0.092,<br>0.93                             |
| No. of reflections                                                                    | 1732                                      | 846                                               | 834                                               | 807                                               | 786                                               |
| No. of parameters                                                                     | 110                                       | 55                                                | 55                                                | 55                                                | 55                                                |
| No. of restraints                                                                     | 1                                         | 39                                                | 37                                                | 37                                                | 37                                                |
| $\Delta_{max}, \Delta_{min}$ (e Å <sup>-3</sup> )                                     | 0.42, -0.40                               | 0.91, -0.94                                       | 0.48, -0.41                                       | 0.50, -0.51                                       | 0.68, -1.20                                       |
| Absolute structure                                                                    | Flack (1983),<br>732 Friedel-<br>pairs    | Flack (1983),<br>390 Friedel-<br>pairs            | Flack (1983),<br>382 Friedel-<br>pairs            | Flack (1983),<br>369 Friedel-<br>pairs            | Flack (1983),<br>350 Friedel-<br>pairs            |
| Flack parameter                                                                       | 0.066 (14)                                | 0.27 (3)                                          | 0.23 (2)                                          | 0.27 (3)                                          | 0.31 (4)                                          |

|                                                                                                                   | 4.9 GPa                                         | 5.9 GPa                                         | 6.8 GPa                                         | 7.9 GPa                                         |
|-------------------------------------------------------------------------------------------------------------------|-------------------------------------------------|-------------------------------------------------|-------------------------------------------------|-------------------------------------------------|
| Crystal data                                                                                                      |                                                 |                                                 |                                                 |                                                 |
| Chemical formula                                                                                                  | C <sub>4</sub> H <sub>9</sub> CuNO <sub>6</sub> |
| <i>M<sub>r</sub></i>                                                                                              | 230.66                                          | 230.66                                          | 230.66                                          | 230.66                                          |
| <i>a</i> , <i>b</i> , <i>c</i> (Å)                                                                                | 9.0447 (5),<br>9.6337 (7),<br>7.3016 (14)       | 8.9747 (5),<br>9.5739 (6),<br>7.2465 (11)       | 8.9403 (6),<br>9.5601 (8),<br>7.2112 (14)       | 8.9493 (9),<br>9.6210 (13),<br>7.059 (2)        |
| β (°)                                                                                                             | 91.765 (10)                                     | 91.332 (8)                                      | 90.949 (12)                                     | 89.829 (18)                                     |
| <i>V</i> (Å <sup>3</sup> )                                                                                        | 635.92 (14)                                     | 622.47 (11)                                     | 616.26 (14)                                     | 607.8 (2)                                       |
| Radiation type                                                                                                    | Synchrotron, λ =<br>0.47620 Å                   |
| μ (mm <sup>-1</sup> )                                                                                             | 3.43                                            | 3.50                                            | 3.54                                            | 3.58                                            |
| Crystal size (mm)                                                                                                 | 0.20 × 0.20 ×<br>0.10                           |
| Data collection                                                                                                   |                                                 |                                                 |                                                 |                                                 |
| Diffractometer                                                                                                    | Bruker Apex2<br>diffractometer                  | Bruker Apex2<br>diffractometer                  | Bruker Apex2<br>diffractometer                  | Bruker Apex2<br>diffractometer                  |
| Absorption correction                                                                                             | Multi-scan<br><i>SADABS</i><br>(Siemens, 1996)  | Multi-scan<br><i>SADABS</i><br>(Siemens, 1996)  | Multi-scan<br><i>SADABS</i><br>(Siemens, 1996)  | Multi-scan<br><i>SADABS</i><br>(Siemens, 1996)  |
| <i>T<sub>min</sub></i> , <i>T<sub>max</sub></i>                                                                   | 0.62, 0.71                                      | 0.61, 0.70                                      | 0.56, 0.70                                      | 0.49, 0.70                                      |
| No. of measured,<br>independent and<br>observed [ <i>I</i> > 2.0σ( <i>I</i> )<br>reflections                      | 2538, 728, 566                                  | 2505, 723, 582                                  | 2337, 674, 512                                  | 1994, 647, 230                                  |
| <i>R<sub>int</sub></i>                                                                                            | 0.042                                           | 0.043                                           | 0.060                                           | 0.091                                           |
| Refinement                                                                                                        |                                                 |                                                 |                                                 |                                                 |
| <i>R</i> [ <i>F</i> <sup>2</sup> > 2σ( <i>F</i> <sup>2</sup> )],<br><i>wR</i> ( <i>F</i> <sup>2</sup> ), <i>S</i> | 0.029, 0.062,<br>0.87                           | 0.031, 0.064,<br>0.96                           | 0.040, 0.096,<br>0.87                           | 0.048, 0.247,<br>1.01                           |
| No. of reflections                                                                                                | 728                                             | 714                                             | 669                                             | 647                                             |
| No. of parameters                                                                                                 | 55                                              | 55                                              | 55                                              | 55                                              |
| No. of restraints                                                                                                 | 37                                              | 37                                              | 37                                              | 37                                              |
| Δ <sub>max</sub> , Δ <sub>min</sub> (e Å <sup>-3</sup> )                                                          | 0.32, -0.31                                     | 0.51, -0.50                                     | 0.76, -0.81                                     | 1.08, -1.16                                     |
| Absolute structure                                                                                                | Flack (1983),<br>322 Friedel-pairs              | Flack (1983),<br>322 Friedel-pairs              | Flack (1983),<br>309 Friedel-pairs              | Flack (1983),<br>300 Friedel-pairs              |
| Flack parameter                                                                                                   | 0.29 (3)                                        | 0.26 (3)                                        | 0.27 (5)                                        | 0.04 (12)                                       |

Figure S1. Cu-O bond lengths as a function of pressure.

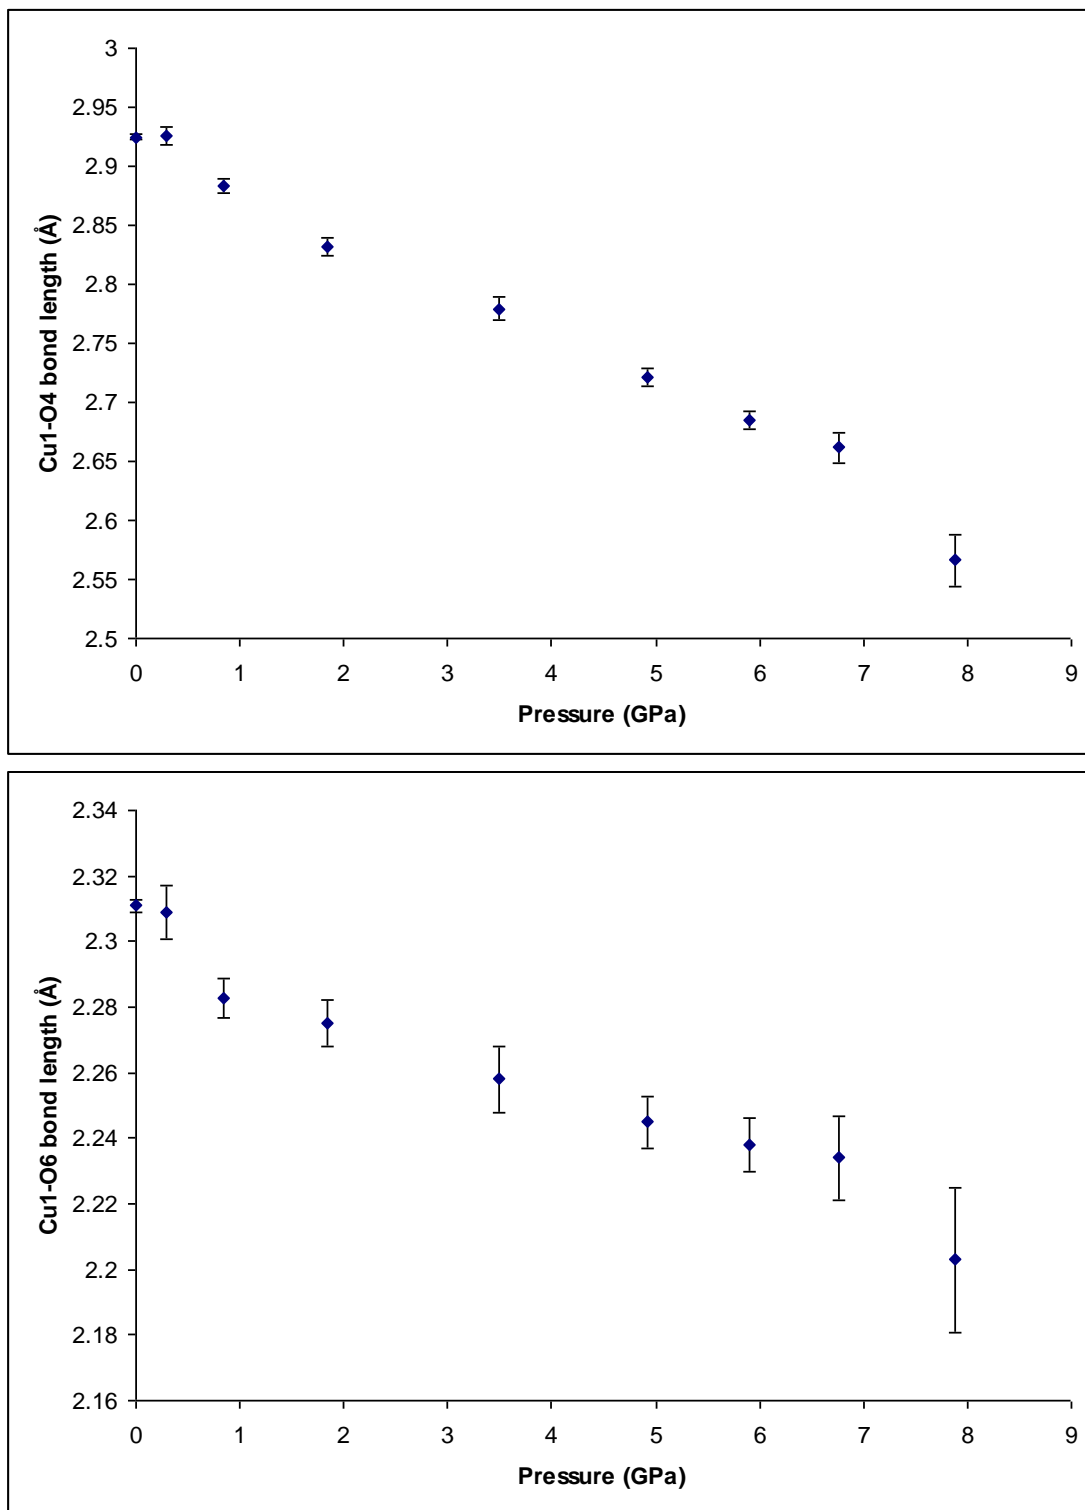

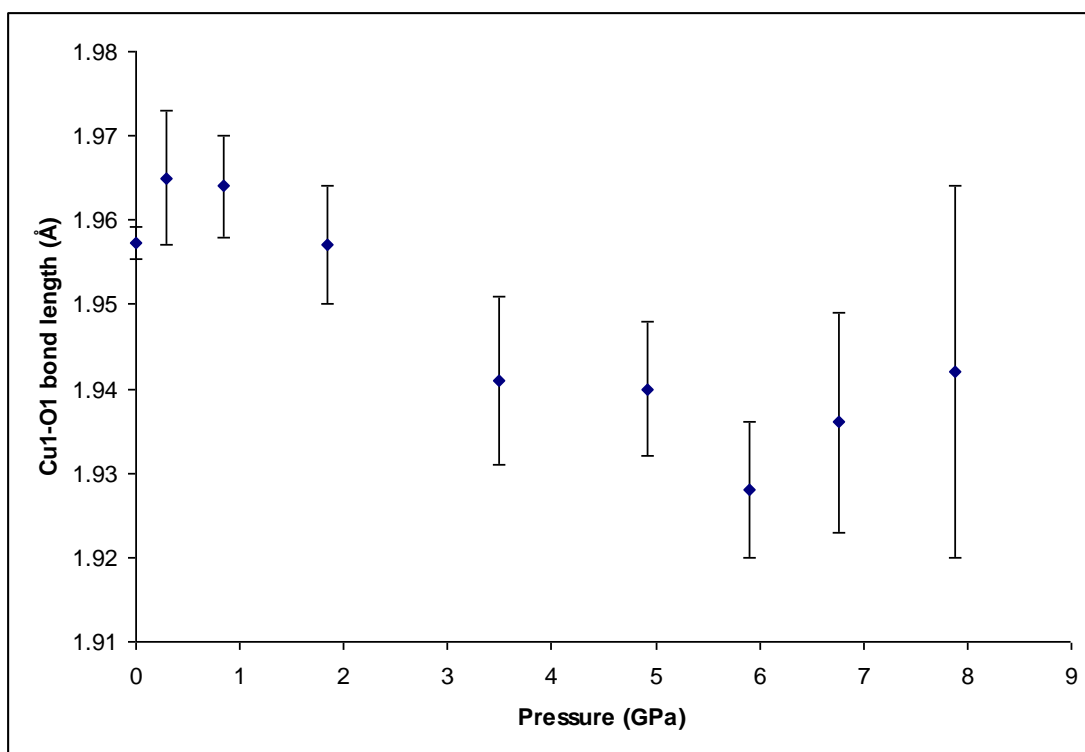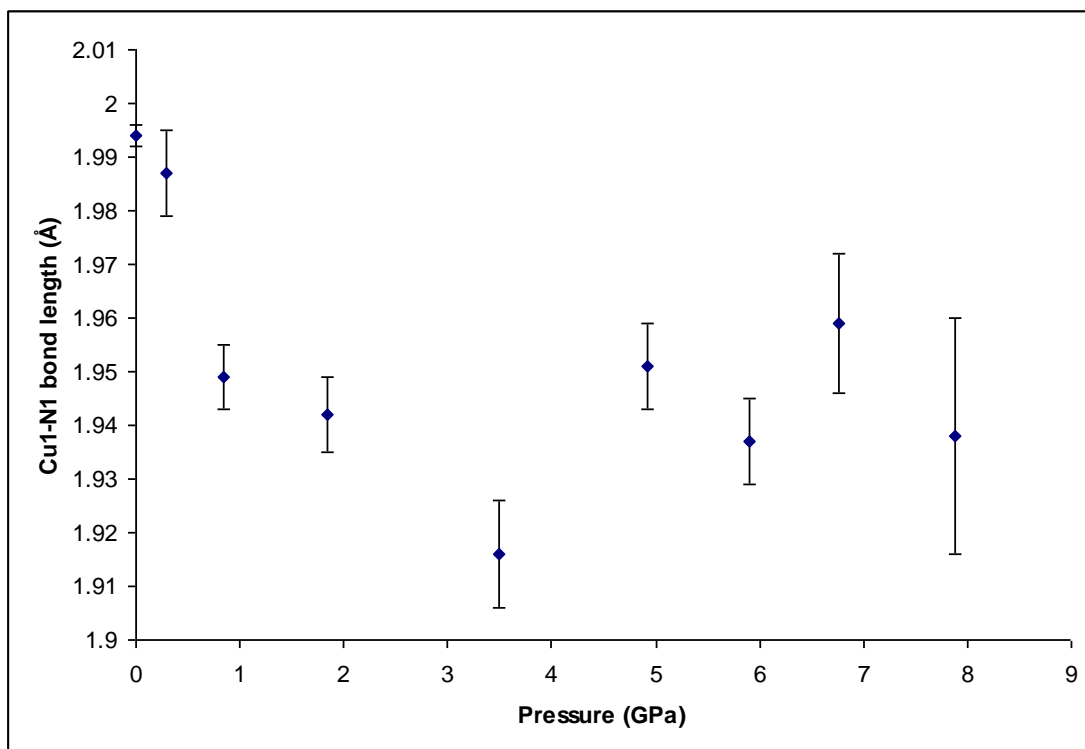

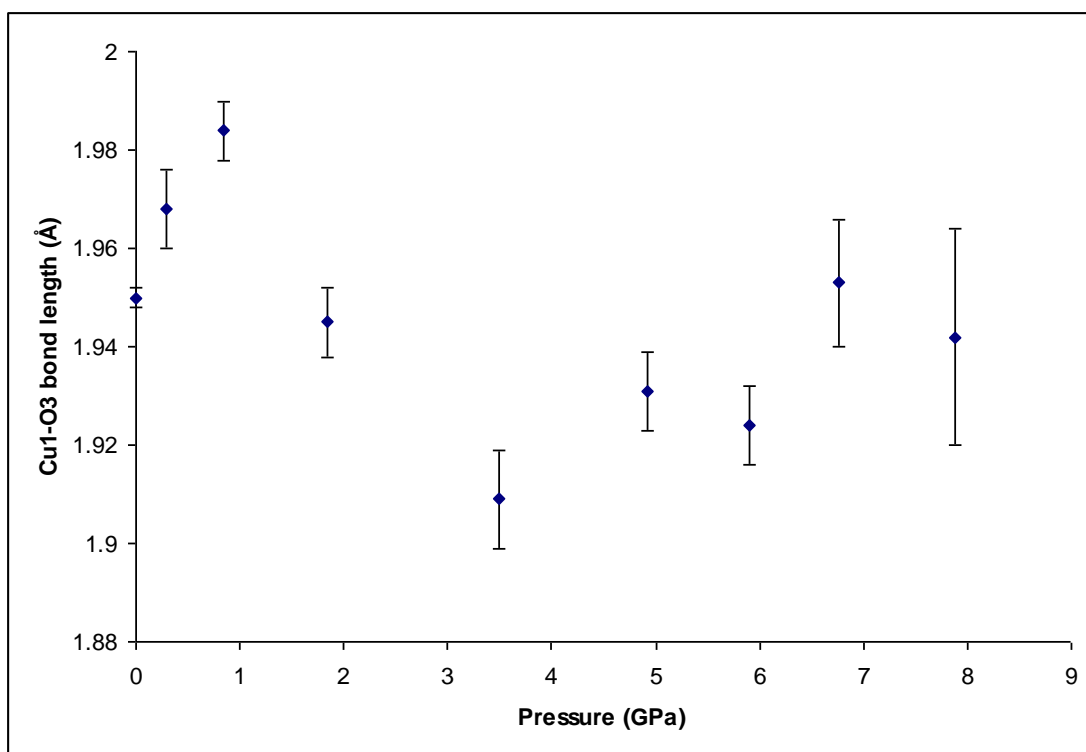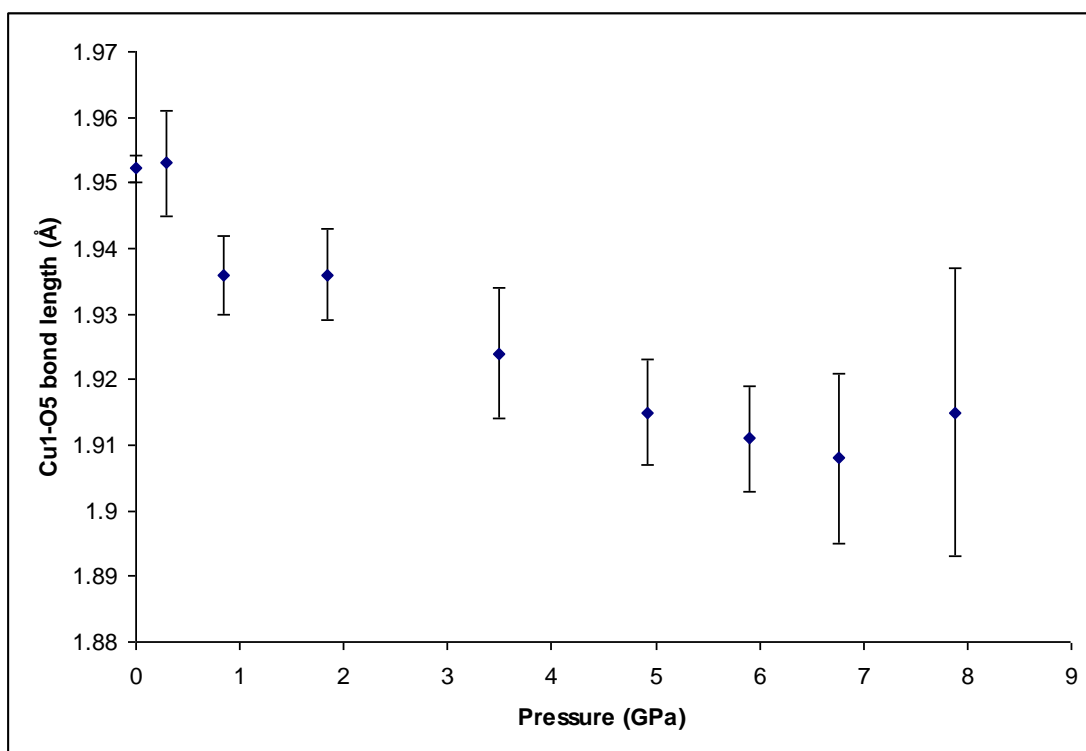

Figure S2. N-H...O and O-H...O H-bonding interactions as a function of pressure (D-A distances are quoted).

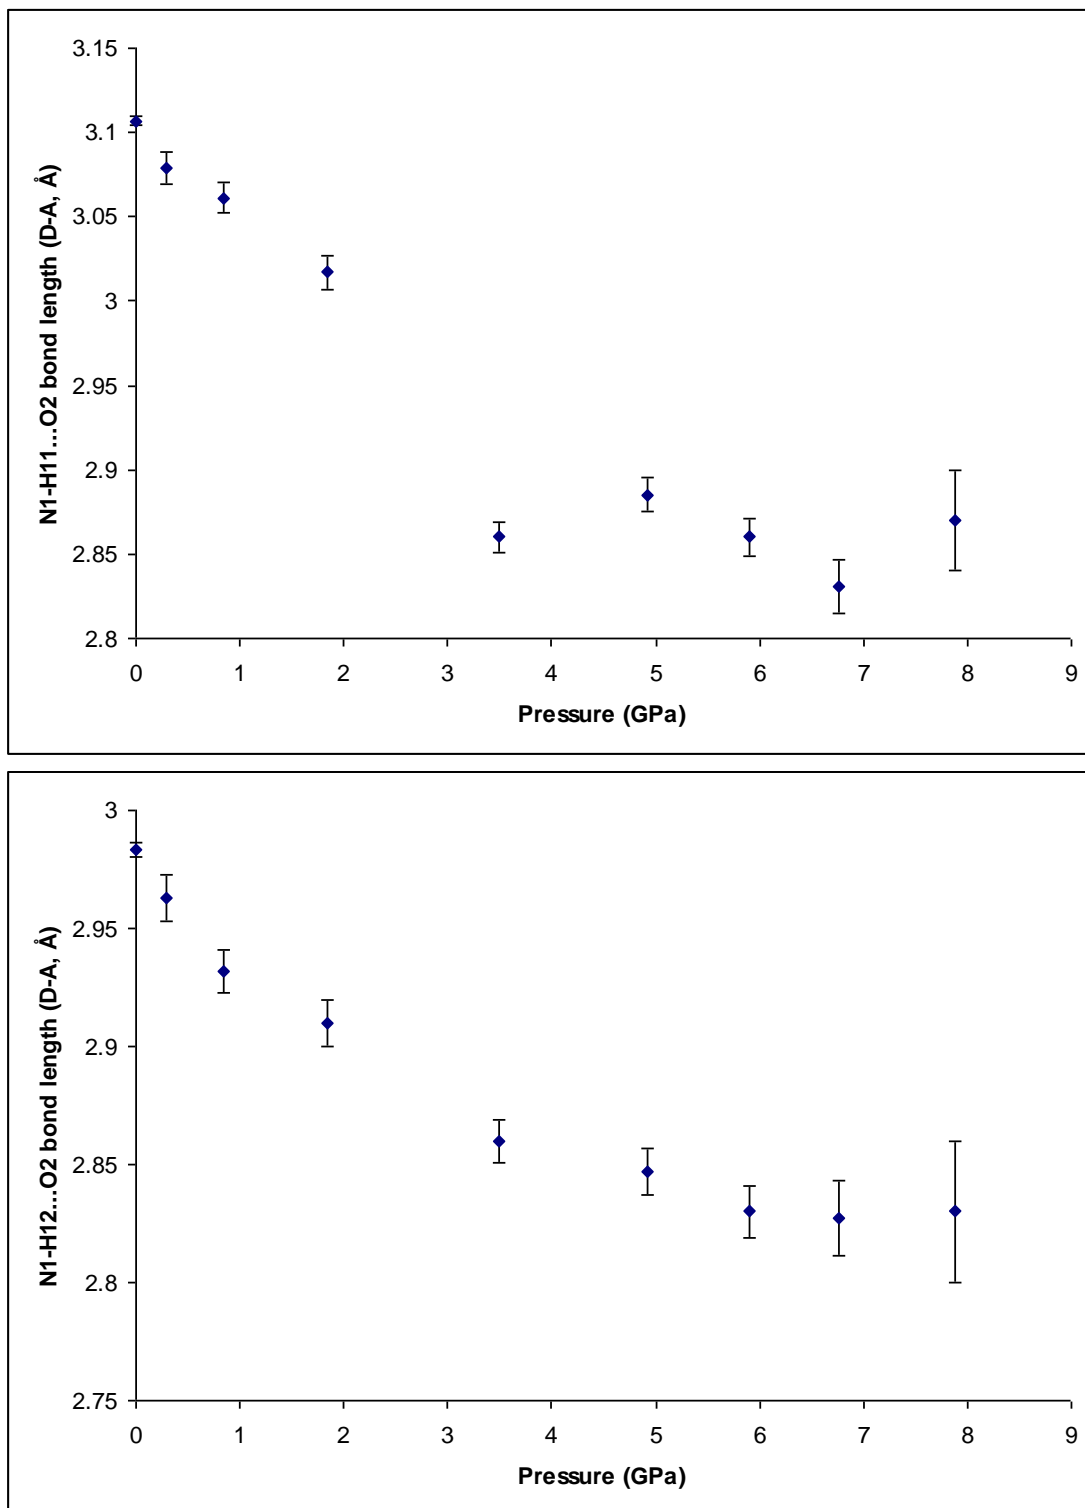



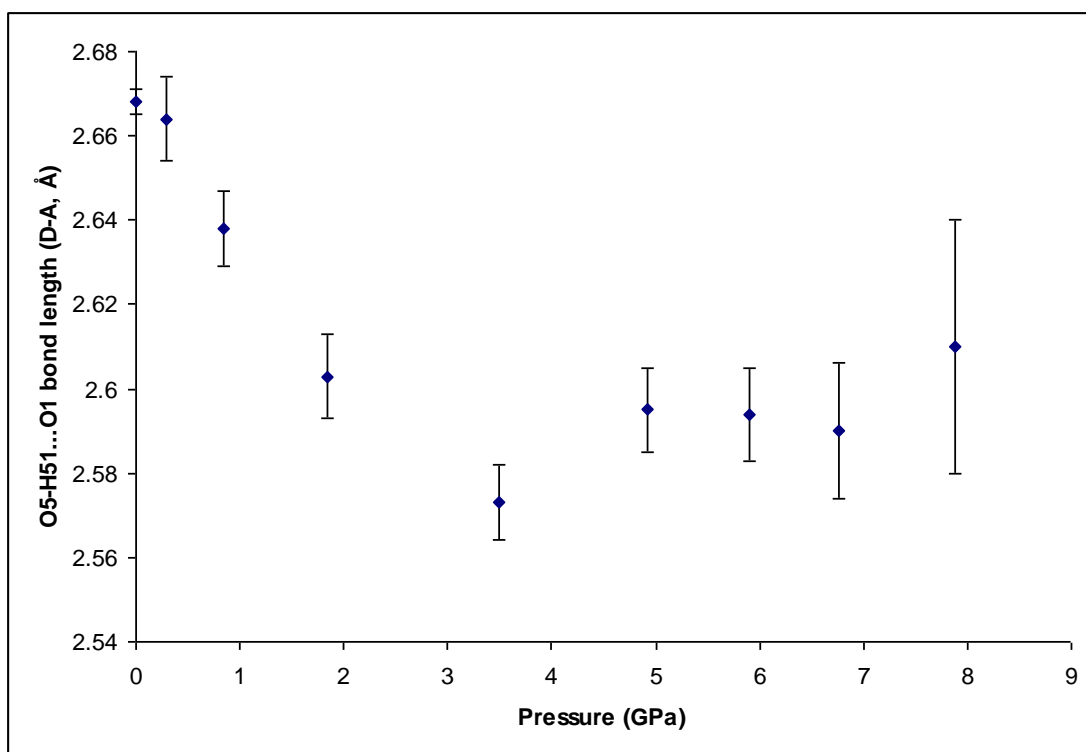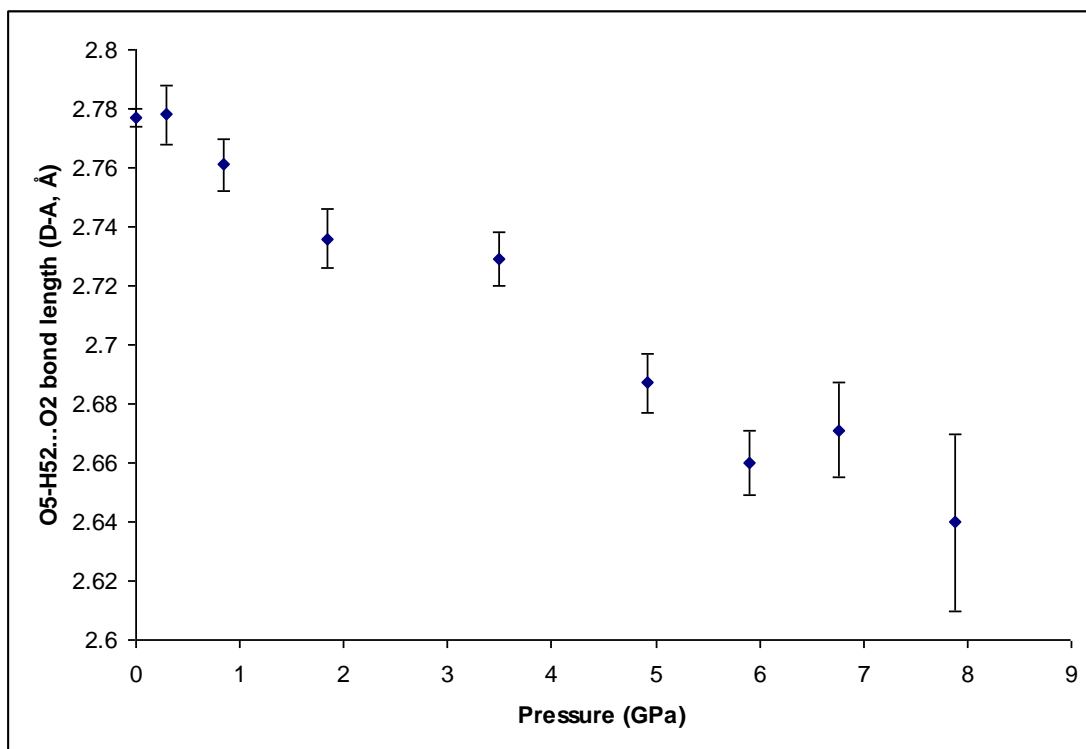

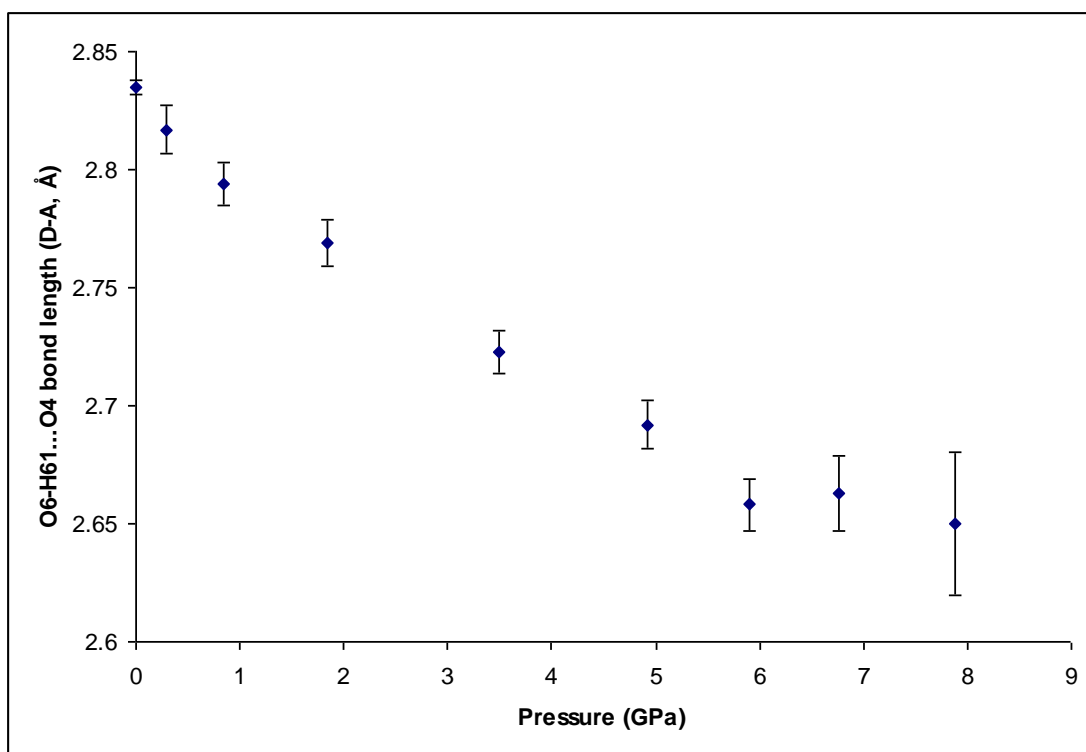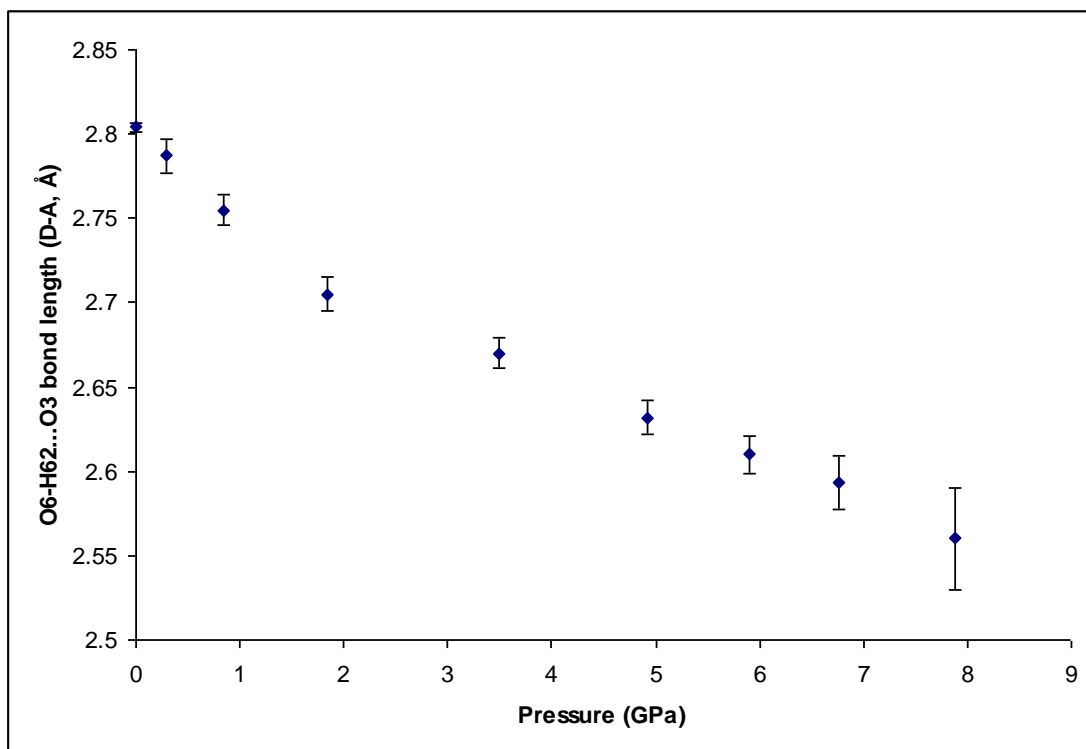

S2. Intramolecular angles in CuAsp as a function of pressure.

| Bond/Valence Angles   | Pressure (GPa) |           |            |           |          |           |           |          |           |
|-----------------------|----------------|-----------|------------|-----------|----------|-----------|-----------|----------|-----------|
|                       | 0              | 0.3       | 0.9        | 1.8       | 3.5      | 4.9       | 5.9       | 6.8      | 7.9       |
| O(1) - Cu(1) - O(5)   | 172.71(7)      | 172.6(3)  | 173.0(2)   | 173.6(2)  | 173.9(3) | 173.8(3)  | 173.4(3)  | 174.0(5) | 175.1(9)  |
| O(1) - Cu(1) - O(3)b  | 90.80(10)      | 91.3(3)   | 90.7(3)    | 90.2(3)   | 90.2(3)  | 89.9(3)   | 89.5(3)   | 90.2(4)  | 89.6(7)   |
| O(5) - Cu(1) - N(1)   | 89.70(8)       | 89.9(3)   | 89.9(2)    | 90.2(3)   | 91.1(4)  | 89.8(3)   | 89.3(3)   | 90.0(6)  | 90.1(11)  |
| O(6) - Cu(1) - N(1)   | 96.81(8)       | 97.1(3)   | 98.0(3)    | 98.4(3)   | 99.7(4)  | 100.2(3)  | 101.2(3)  | 101.4(5) | 107.8(11) |
| N(1) - Cu(1) - O(3)b  | 168.17(11)     | 167.7(2)  | 166.96(19) | 167.0(2)  | 166.4(3) | 166.5(2)  | 166.2(2)  | 166.3(3) | 165.1(7)  |
| Cu(1) - O(1) - C(1)   | 115.72(17)     | 115.8(5)  | 114.4(4)   | 114.1(5)  | 114.7(6) | 114.6(4)  | 114.5(5)  | 114.6(7) | 113.4(12) |
| Cu(1) - N(1) - C(2)   | 110.50(15)     | 110.9(4)  | 110.6(4)   | 111.2(4)  | 111.9(5) | 109.3(4)  | 109.2(4)  | 108.7(6) | 107.9(10) |
| O(1) - Cu(1) - O(6)   | 91.90(7)       | 91.96(17) | 92.73(14)  | 92.41(15) | 92.9(2)  | 93.29(17) | 94.04(19) | 94.1(3)  | 95.4(6)   |
| O(1) - Cu(1) - O(4)b  | 88.00(7)       | 88.1(2)   | 86.7(2)    | 86.1(2)   | 85.3(3)  | 84.7(2)   | 83.8(2)   | 83.8(4)  | 81.9(6)   |
| O(5) - Cu(1) - O(3)b  | 95.99(10)      | 95.6(3)   | 95.1(3)    | 94.9(3)   | 94.1(4)  | 95.2(3)   | 95.8(3)   | 94.9(6)  | 94.7(12)  |
| O(6) - Cu(1) - O(3)b  | 93.53(8)       | 93.8(3)   | 94.0(3)    | 93.5(3)   | 92.7(4)  | 92.4(3)   | 91.7(3)   | 91.5(4)  | 86.6(10)  |
| N(1) - Cu(1) - O(4)b  | 119.69(8)      | 119.3(2)  | 117.40(18) | 116.2(2)  | 114.3(3) | 113.1(2)  | 112.2(2)  | 111.9(3) | 108.1(7)  |
| C(4) - O(3) - Cu(1)a  | 115.36(17)     | 114.9(4)  | 113.3(4)   | 112.0(4)  | 110.5(5) | 108.6(4)  | 107.7(4)  | 105.7(6) | 101.8(12) |
| O(1) - Cu(1) - N(1)   | 83.15(8)       | 82.9(3)   | 83.7(2)    | 84.0(3)   | 83.7(3)  | 84.4(2)   | 84.7(3)   | 84.3(4)  | 85.2(7)   |
| O(5) - Cu(1) - O(6)   | 90.33(8)       | 90.39(19) | 90.71(15)  | 91.20(16) | 91.2(2)  | 89.97(18) | 89.7(2)   | 89.1(4)  | 87.2(7)   |
| O(5) - Cu(1) - O(4)b  | 94.36(6)       | 94.2(3)   | 94.0(2)    | 94.0(3)   | 93.8(4)  | 95.5(3)   | 96.1(3)   | 96.4(6)  | 98.5(11)  |
| O(6) - Cu(1) - O(4)b  | 143.16(7)      | 143.3(3)  | 144.2(3)   | 144.9(3)  | 145.5(4) | 146.2(3)  | 146.1(3)  | 146.2(4) | 143.6(9)  |
| O(3)b - Cu(1) - O(4)b | 49.65(7)       | 49.47(17) | 50.30(13)  | 51.58(16) | 52.9(2)  | 53.94(17) | 54.62(19) | 54.9(3)  | 57.2(5)   |
| C(4) - O(4) - Cu(1)a  | 70.01(14)      | 69.7(5)   | 71.2(4)    | 70.8(4)   | 70.8(6)  | 72.6(4)   | 73.0(5)   | 73.6(7)  | 74.6(12)  |

Symmetry operator: a=[ 1554.01 ] = x,y,-1+z, b=[ 1556.01 ] = x,y,1+z

Table S3. Torsion angles in CuAsp as a function of pressure.

| Torsion/Dihedral Angles | Pressure (GPa) |           |           |           |           |           |           |           |            |
|-------------------------|----------------|-----------|-----------|-----------|-----------|-----------|-----------|-----------|------------|
|                         | 0              | 0.3       | 0.9       | 1.8       | 3.5       | 4.9       | 5.9       | 6.8       | 7.9        |
| O(6) Cu(1) O(1) C(1)    | -81.1(2)       | -81.9(4)  | -81.0(4)  | -82.5(4)  | -83.6(6)  | -85.3(4)  | -86.3(5)  | -86.6(7)  | -93.1(14)  |
| O(4)b Cu(1) O(1) C(1)   | 135.74(19)     | 134.8(4)  | 134.9(3)  | 132.6(3)  | 130.9(5)  | 128.5(4)  | 127.6(4)  | 127.3(6)  | 123.4(11)  |
| O(6) Cu(1) N(1) C(2)    | 72.84(16)      | 72.6(4)   | 71.8(3)   | 71.0(4)   | 70.0(5)   | 70.8(4)   | 71.0(4)   | 70.9(6)   | 69.1(12)   |
| O(5) Cu(1) O(3)b C(4)b  | 96.5(2)        | 97.9(4)   | 97.9(3)   | 98.3(3)   | 98.7(4)   | 100.0(3)  | 100.4(4)  | 102.3(6)  | 104.4(11)  |
| O(5) Cu(1) O(4)b C(4)b  | -100.03(18)    | -100.7(4) | -100.2(3) | -100.2(3) | -99.5(5)  | -99.5(3)  | -100.0(4) | -99.5(6)  | -97.8(12)  |
| O(2) C(1) O(1) Cu(1)    | 170.5(2)       | 170.1(4)  | 171.1(3)  | 171.4(3)  | 172.3(5)  | 172.3(4)  | 172.6(5)  | 173.5(7)  | 175.6(12)  |
| O(1) C(1) C(2) C(3)     | 115.0(3)       | 113.2(5)  | 113.7(5)  | 110.9(5)  | 107.8(7)  | 104.8(6)  | 103.2(6)  | 102.5(9)  | 97.8(15)   |
| C(1) C(2) N(1) Cu(1)    | 18.1(2)        | 18.9(5)   | 20.1(4)   | 21.3(4)   | 23.3(6)   | 24.2(5)   | 25.1(5)   | 25.4(7)   | 30.1(13)   |
| C(1) C(2) C(3) C(4)     | 157.0(2)       | 156.1(4)  | 156.6(4)  | 156.3(4)  | 157.4(6)  | 156.9(4)  | 156.9(5)  | 158.0(7)  | 160.3(12)  |
| O(4) C(4) O(3) Cu(1)a   | -12.8(3)       | -15.5(7)  | -14.8(6)  | -15.4(6)  | -15.3(9)  | -14.7(6)  | -14.9(7)  | -16.7(10) | -15.5(2)   |
| C(3) C(4) O(4) Cu(1)a   | -167.2(3)      | -168.7(5) | -167.7(5) | -168.9(5) | -168.6(7) | -168.3(5) | -169.0(5) | -168.2(8) | -164.4(16) |
| N(1) Cu(1) O(1) C(1)    | 15.51(19)      | 15.1(4)   | 16.8(3)   | 15.7(3)   | 15.8(5)   | 14.6(4)   | 14.6(5)   | 14.5(7)   | 14.3(12)   |
| O(1) Cu(1) N(1) C(2)    | -18.27(15)     | -18.5(4)  | -20.1(3)  | -20.6(4)  | -21.9(5)  | -21.5(4)  | -22.1(4)  | -22.1(6)  | -25.0(11)  |
| O(4)b Cu(1) N(1) C(2)   | -102.01(15)    | -102.3(4) | -103.1(3) | -103.2(4) | -103.9(5) | -103.3(4) | -103.2(4) | -103.1(6) | -104.8(11) |
| O(6) Cu(1) O(3)b C(4)b  | -172.8(2)      | -171.4(4) | -171.1(3) | -170.2(3) | -169.9(4) | -169.9(3) | -169.7(3) | -168.5(5) | -168.7(10) |
| O(6) Cu(1) O(4)b C(4)b  | -3.6(2)        | -4.4(4)   | -3.3(3)   | -2.4(4)   | -1.7(5)   | -1.2(4)   | -1.4(4)   | -1.5(7)   | -0.8(14)   |
| C(2) C(1) O(1) Cu(1)    | -8.7(3)        | -7.7(5)   | -9.0(5)   | -6.8(5)   | -5.5(7)   | -3.4(6)   | -2.8(7)   | -2.6(9)   | 0.6(16)    |
| O(2) C(1) C(2) N(1)     | 174.1(2)       | 174.4(4)  | 172.4(3)  | 172.1(4)  | 170.5(6)  | 169.9(4)  | 169.3(5)  | 168.1(7)  | 163.9(13)  |
| C(3) C(2) N(1) Cu(1)    | -102.6(2)      | -101.5(6) | -99.8(5)  | -97.9(6)  | -94.4(7)  | -94.0(6)  | -92.7(6)  | -91.7(8)  | -87.9(14)  |
| C(2) C(3) C(4) O(3)     | 170.6(2)       | 169.9(5)  | 169.1(4)  | 168.7(4)  | 168.7(6)  | 168.7(4)  | 168.3(5)  | 166.6(7)  | 166.2(14)  |
| C(3) C(4) O(3) Cu(1)a   | 162.8(2)       | 163.3(4)  | 162.9(3)  | 163.9(3)  | 163.7(5)  | 164.0(4)  | 164.7(4)  | 163.7(6)  | 161.0(12)  |
| O(3)b Cu(1) O(1) C(1)   | -174.7(2)      | -175.8(4) | -175.0(3) | -176.0(3) | -176.4(5) | -177.7(4) | -177.9(4) | -178.2(6) | -179.7(12) |
| O(5) Cu(1) N(1) C(2)    | 163.14(15)     | 163.0(4)  | 162.5(3)  | 162.3(4)  | 161.5(5)  | 160.8(4)  | 160.6(5)  | 160.0(7)  | 156.2(13)  |
| O(1) Cu(1) O(3)b C(4)b  | -80.8(2)       | -79.3(4)  | -78.3(3)  | -77.8(3)  | -76.9(4)  | -76.6(3)  | -75.7(4)  | -74.4(5)  | -73.3(10)  |
| O(1) Cu(1) O(4)b C(4)b  | 86.88(18)      | 86.3(3)   | 86.9(3)   | 86.3(3)   | 86.6(4)   | 86.8(3)   | 86.7(3)   | 86.6(5)   | 87.2(11)   |
| N(1) Cu(1) O(4)b C(4)b  | 167.83(18)     | 167.1(3)  | 168.0(3)  | 167.6(3)  | 167.6(4)  | 168.4(3)  | 168.3(3)  | 167.9(5)  | 169.4(10)  |
| O(1) C(1) C(2) N(1)     | -6.7(3)        | -7.8(6)   | -7.5(5)   | -9.7(5)   | -11.6(7)  | -14.2(6)  | -15.1(6)  | -15.7(9)  | -20.9(16)  |
| O(2) C(1) C(2) C(3)     | -64.3(3)       | -64.6(6)  | -66.4(5)  | -67.3(5)  | -70.1(8)  | -71.1(6)  | -72.4(6)  | -73.7(9)  | -77.3(16)  |
| N(1) C(2) C(3) C(4)     | -82.2(3)       | -83.7(6)  | -83.5(6)  | -85.2(6)  | -86.2(8)  | -84.6(6)  | -85.4(7)  | -84.1(10) | -81.8(18)  |
| C(2) C(3) C(4) O(4)     | -13.5(3)       | -11.3(7)  | -13.2(6)  | -12.1(7)  | -12.2(9)  | -12.7(7)  | -12.1(8)  | -13.0(11) | -17(2)     |
| O(3) C(4) O(4) Cu(1)a   | 8.2(2)         | 10.0(5)   | 9.8(4)    | 10.3(5)   | 10.4(6)   | 10.3(5)   | 10.6(5)   | 12.2(8)   | 11.9(16)   |

Symmetry operator: a = [ 1554.01 ] = x,y,-1+z, b = [ 1556.01 ] = x,y,1+z

## References

1. G. J. Piermarini, S. Block, J. D. Barnett and R. A. Forman, *Journal of Applied Physics*, 1975, 46, 2774-2780.
2. Bruker-Nonius, *SAINTE version 7*, (2006) Bruker-AXS, Madison, Wisconsin, USA.
3. G. M. Sheldrick, *SADABS Version 2004-1*, (2004) Bruker-AXS, Madison, Wisconsin, USA.
4. P. W. Betteridge, J. R. Carruthers, R. I. Cooper, K. Prout and D. J. Watkin, *Journal of Applied Crystallography*, 2003, 36, 1487.
5. A. Altomare, G. Casciarano, C. Giacovazzo, A. Guagliardi, B. M. C. G. Polidori and M. Camalli, *Journal of Applied Crystallography*, 1994, 27, 435-435.
6. A. Dawson, D. R. Allan, S. Parsons and M. Ruf, *Journal of Applied Crystallography*, 2004, 37, 410-416.
7. S. Parsons, *S.SHADE*, (2004) The University of Edinburgh, Edinburgh, United Kingdom.
